## Title page

### Title:

Determinants of the incidence and mortality rates of COVID-19 during the first six months of the pandemic; a cross-country study

### Authors:

Noha Asem<sup>1,2</sup>; Ahmed Ramadan<sup>3,4</sup>; Mohamed Hassany<sup>2</sup>; Ramy Mohamed Ghazy<sup>5</sup>; Mohamed Abdallah<sup>6</sup>; Eman M. Gamal<sup>2</sup>; Shaimaa Hassan<sup>2</sup>; Nehal Kamal<sup>7</sup>; Hala Zaid<sup>2</sup>

### Affiliation:

- 1- Department of public health, Faculty of Medicine, Cairo University
- 2- Ministry of Health and Population, Egypt
- 3- Department of Data Science and Medical Information, DataClin CRO, Egypt
- 4- Department of applied statistics, Faculty of postgraduate studies for Statistical Research, Cairo University
- 5- Tropical Health Department, High Institute of Public Health, Alexandria, Egypt
- 6- Medical Research Division, National Research Center, Giza, Egypt
- 7- Children's Cancer Hospital (CCHE) 57357, Egypt

### Keywords:

COVID-19; Incidence rate; Mortality rate; Social mobility; Ecological factors; Contact frequency

## Abstract

COVID-19 pandemic raises an extraordinary challenge to the healthcare systems globally. The governments are taking key measures to constrain the corresponding health, social, and economic impacts, however, these measures vary depending on the nature of the crisis and country-specific circumstances. **Objectives:** Considering different incidence and mortality rates across different countries, we aimed at explaining variance of these variables by performing accurate and precise multivariate analysis with aid of suitable predictors, accordingly, the model would proactively guide the governmental responses to the crisis. **Methods:** Using linear and exponential time series analysis, this research aimed at studying the incidence and mortality rates of COVID-19 in 18 countries during the first six months of the pandemic, and further utilize multivariate techniques to explain the variance in monthly exponential growth rates of cases and deaths with aid of a set of different predictors: the recorded Google mobility trends towards six categories of places, daily average temperature, daily humidity, and key socioeconomic attributes of each country. **Results:** The analysis showed that changes in mobility trends were the most significant predictors of the incidence and mortality rates, temperature and humidity were also significant but to a much lesser extent, on the other hand, the socioeconomic attributes did not contribute significantly to explaining different incidence and mortality rates across countries. **Conclusion:** Changes in mobility trends across countries dramatically affected the incidence and mortality rates across different countries, thus, it might be used as a proxy measure of contact frequency.

# 1 **Determinants of the incidence and mortality rates of COVID-19 during the first six months** 2 **of the pandemic; A cross-country study**

3

## 4 **Introduction**

5 The World Health Organization (WHO) estimates that approximately one-third (e.g., 20  
6 million) of the annual deaths worldwide were attributed to infectious diseases. Furthermore,  
7 three of the 10-topped causes of deaths are lower respiratory tract infection, tuberculosis, and  
8 diarrheal disease, and many of these diseases can be prevented or treated by for as little as one  
9 dollar for head.<sup>1</sup> The morbidity from infectious disease has increased during the past few decades  
10 and represents at least 70% of emerging infectious diseases (EID), which are a significant burden  
11 on global economic and public health.<sup>2, 3</sup> Emerging infectious diseases (EIDs) cause a  
12 substantial economic and public health burden in the world.<sup>4, 5</sup> The most likely causes of the  
13 emergence of EIDs are socioeconomic, environmental, and ecological factors.<sup>3-6</sup> It is postulated  
14 that the origins of EIDs are significantly correlated with socioeconomic, environmental and  
15 ecological factors that provide a clue for identifying regions where new EIDs are most likely to  
16 originate.<sup>6</sup> These factors also present a basis of risk for wildlife zoonotic and vector-borne EIDs  
17 originating at lower latitudes, where reporting effort is low<sup>6, 7</sup>.

18 One of these EID is the novel corona virus (COVID-19) that was firstly identified in  
19 December 2019 in Wuhan city, in China. It resulted in unusual pneumonia after visiting animal  
20 market that sells poultry, fish and other animals to the public.<sup>8</sup> This outbreak was soon reported  
21 to the World Health Organization (WHO). Due to this pandemic, the entire life has been  
22 changed. Millions of people have been infected (21,092,417), and hundreds of thousands have  
23 been deceased (757,738) by the novel corona virus.<sup>9</sup> Countries adopted different strategies to  
24 combat the spread of this pandemic. Many countries implemented the national lockdown policy  
25 that extended for different duration during daytime. Another strategy was social distancing, and  
26 panning going out of homes without waring facemasks. International travel from and to infected  
27 countries was another effective strategy used to face the spread of this pandemic.<sup>10, 11</sup>

28 It is worthy to note that COVID-19 does not affect everyone in the same way,  
29 furthermore, it is not easy to understand the consequences and to predict how this pandemic

30 affects differently various countries. There are several reasons that is why different population  
31 are affected by this pandemic in different ways. These conditions can include socioeconomic  
32 factors (income, population density, distribution of human population, urban and rural settings,  
33 education level, and lifestyle, the size of household, and homeowners & tenants), behavior  
34 factors (direct contact with domestic and wild animals, migration, social interactions), and  
35 environment factors (humidity, temperature, wind spread, climate change, deforestation,  
36 agricultural growth)<sup>12, 13</sup>

37 This ecological study aimed at studying the effect of different sociodemographic criteria,  
38 environmental factors, and human behaviors that affect the transmission of COVID-19 and  
39 predict its virulence. Transmission rate was measured by daily incidence of new cases as  
40 reported by national health authority of studied countries, of new cases while virulence was  
41 assessed by the number of confirmed deaths.

42

## Methods

43

44

### Data collection

45

Eighteen countries were designated for analysis, representing different climates, socioeconomic status, population densities, and different counts of confirmed COVID-19 cases.

46

47

Through the period from 1<sup>st</sup> of January to 30<sup>th</sup> of June 2020, the daily counts of COVID-19

48

confirmed cases and deaths for 18 countries were collected from

49

<https://ourworldindata.org/coronavirus-source-data>, the daily average temperature and relative

50

humidity of the capital cities of the selected countries were collected from

51

<https://www.wunderground.com/>. Socioeconomic attributes of the selected countries were

52

collected from <https://ourworldindata.org/coronavirus-data>, these attributes included the

53

population density per Km<sup>2</sup>, Human Development Index (HDI), Per Capita Income (PCI), Gross

54

Domestic Product (GDP) in (USD), internet coverage, density, surface (Km<sup>2</sup>), Population count,

55

and proportion of the population aged 65 years or above, and proportion of the population

56

suffering from diabetes mellitus. The recorded policy responses of the selected countries to

57

COVID-19 were retrieved from the International Monetary Fund

58

(<https://www.imf.org/en/Topics/imf-and-covid19/Policy-Responses-to-COVID-19>) accessed on

59

15<sup>th</sup> of August 2020. For each of the selected countries (except for China and Iran), Google daily

60

documentation on mobility trends across different categories of places such as retail and

61

recreation, groceries and pharmacies, parks, transit stations, workplaces, and residential was

62

retrieved. Google documentations was presented by percent change in mobility across the

63

mentioned places compared to the baseline, which is the median value of mobility trends, for the

64

corresponding day of the week, during the 5-week period Jan 3–Feb 6, 2020 <sup>(14)</sup>. Google data

65

was retrieved from <https://www.google.com/covid19/mobility/index.html?hl=en>.

66

### Statistical Analysis

67

Data analysis was conducted using SPSS software (version 25, IBM, USA). The Daily

68

counts of confirmed cases and deaths for each country were split by month and were further

69

linearly and exponentially modelled with time. The linear equation was based on the equation ( $y_1$

70

$= a + \beta x_1$ ), where  $y$  is the confirmed cases or deaths for a given day of this month, the constant ( $a$ )

71 is the number of cases at day 0 (the count before start of that month),  $\beta$  is the linear slope  
72 coefficient which is presenting the average daily increase in the count of confirmed cases or  
73 deaths within this month, and  $x$  is the day number of that month. On the other hand, the  
74 exponential equation is based on the equation ( $y_1 = a e^{\beta x_1}$ ), where  $e^{\beta}$  is the average daily  
75 multiplying factor for increase or in other word, the exponential growth rate in a given month.  
76 The daily average temperatures of the capital cities were aggregated to monthly temperature for  
77 each country. Google documentation were handled using big data analytics with R software  
78 (version 3.5.3, <http://cran.r-project.org>; R Foundation for Statistical Computing, Vienna, Austria)  
79 to aggregate the data into the monthly mean percent change from the baseline across six  
80 categories of places for each of the selected countries.

81 The linear and exponential slope coefficients herein after referred to as linear growth rate  
82 and exponential growth rate, respectively. Non-parametric correlation between variables was  
83 assessed using Spearman rho's test. The monthly exponential growth rates of confirmed cases  
84 and deaths were regressed versus the collected predictors for each country using mixed effects  
85 model with unstructured covariance. The highly correlated Variables was subjected to principal  
86 component analysis (PCA) with varimax rotation, and the extracted PCs were utilized for the  
87 regression models.

88

## Results

### 89 **Mathematical pattern of incidence and mortality at the start of the pandemic**

90 Time series analysis was conducted for the monthly records of confirmed cases and  
91 deaths, both linear and exponential growth models were studied. The  $R^2$ , constant, and  $\beta$  (Slope  
92 coefficient) of the linear and exponential models are presented in (**Supplementary material 1**).  
93 In January 2020, China was the only country that reported confirmed deaths with COVID-19,  
94 China, Australia, Canada, France, Germany, and the United States of America have reported  
95 confirmed cases with COVID-19 that are valid for statistical modeling. During January, the  $R^2$  of  
96 linear models for confirmed cases by time in most of the selected countries were higher than that  
97 of the corresponding  $R^2$  of the exponential model for the same data, in other words, the growing  
98 data for confirmed cases were better described with linear equations.

### 99 **Further Mathematical pattern of incidence and mortality**

100 Starting from February 2020, and except for Egypt, Indonesia, and Brazil, all the selected  
101 countries started to report an increasing number of confirmed COVID-19 cases. Until June 2020,  
102 the  $R^2$  of the exponential models were occasionally relatively higher than that of the linear  
103 models for confirmed cases and deaths, while in most models they were nearly equal. The  
104 monthly exponential growth rates of confirmed cases and deaths were perfectly correlated  
105 (Spearman correlation coefficient = 0.945,  $P < 0.01$ ). For the 18 countries, the median monthly  
106 growth rates for confirmed cases and deaths are presented in (**Figure 1 and 2**), respectively. We  
107 remarked that the increase in exponential growth in cases and deaths in a given month implies  
108 for an increase in linear growth in the next month, so the highest exponential growth in March  
109 implied for the highest linear growth in April 2020. This is because the exponential growth  
110 multiplies the counts over time, which in turn increases the absolute counts in the next month.

### 111 **Pattern of mobility and its effect on incidence and mortality**

112 The monthly change in mobility trends from baseline across different place categories are  
113 presented in (**Figure 3**). In February 2020, mobility trends almost did not change from the  
114 baseline, then the median value started to decrease in March and April for all place categories  
115 except for mobility trends towards residential places. Afterwards, an inflection has occurred and  
116 the median values for mobility trends increased towards all place categories until the final

117 timepoint in June 2020, in which most of median values were returned to the baseline.  
118 Interestingly, the median value of mobility trends toward parks, beaches and public gardens has  
119 even exceeded the baseline in June 2020 (+25%).

120 It is worth noting that changes in mobility trends affected the exponential growth of  
121 incidence and deaths in the next month. So, we can notice a decrease in mobility trends from  
122 baseline in March, whose median exponential growth is the highest for cases and deaths, but we  
123 can further notice a decrease in exponential growth in the next month of April. This is because  
124 the confirmed cases usually get infected in a given month and been reported in the next month  
125 after a lag period of incubation and confirmation of infection. This remark was tested by  
126 assessing correlation between the exponential growth rates and mobility trends in the same  
127 month. The results are presented in **(Table 1)**, most of the correlations were week and  
128 insignificant, while when mobility trends were tested for correlation with the exponential growth  
129 rates of the next month, we got significant strong positive correlations for new cases and deaths  
130 **(Table 2)**.

### 131 **Effect of mobility on incidence of COVID-19**

132 Monthly lagged exponential growth rates of cases showed intermediate positive  
133 correlation with mobility trends to glossaries and pharmacies ( $r = 0.452$ ,  $P < 0.01$ ), and strong  
134 positive correlation with MPC in mobility trends to transit stations ( $r = 0.712$ ,  $P < 0.001$ ), mobility  
135 trends to workplaces ( $r = 0.77$ ,  $P < 0.01$ ), and mobility trends to retail and recreation ( $r = 0.688$ ,  
136  $P < 0.01$ ), while it showed strong negative correlation with mobility trends to residential places  
137 ( $r = -0.727$ ,  $P < 0.001$ ).

### 138 **Effect of mobility on mortality rate of COVID-19**

139 Monthly lagged Exponential growth rates of deaths showed intermediate significant  
140 positive correlation with changes in mobility trends to groceries and pharmacies ( $r = 0.495$ ,  
141  $P < 0.01$ ), while it had a strong positive correlation with changes in mobility trends to retail and  
142 recreation places ( $r = 0.7$ ,  $P < 0.01$ ), changes in mobility trends to Work places ( $r = 0.775$ ,  $P < 0.01$ ),  
143 and changes in mobility trends to transit stations ( $r = 0.748$ ,  $P < 0.01$ ), and it showed a strong  
144 negative correlation with changes in mobility trends to Residential places ( $r = -0.744$ ,  $P < 0.01$ ).

145



146 **Effect of temperature, humidity and sociodemographic factors on incidence cases and**  
147 **deaths**

148 Monthly average temperatures of countries had a weak significant negative correlation  
149 with exponential growth rates of deaths in the next month ( $r = -0.25$ ,  $P=0.038$ ), while it did not  
150 significantly correlate with exponential growth rates of new cases ( $-0.08$ ,  $P=0.49$ ). Relative  
151 humidity was significantly correlated with the exponential growth rates of confirmed cases ( $r =$   
152  $0.28$ ,  $P=.017$ ) and deaths ( $r=0.31$ ,  $P =0.008$ ) of the next month (**Table 3**). On the other hand, we  
153 did not get any significant correlations upon testing the overall exponential growth rates for cases  
154 and deaths with the socioeconomic factors of the selected countries.

155 **Predictors of incidence and mortality**

156 We modeled the exponential growth rates for cases and deaths with time (months), the  
157 principal component of mobility trends of the previous month, temperature of the previous  
158 month, humidity of the previous month, proportion of population above 65 years, diabetes  
159 prevalence, and PCI of each country as predictors.

160 • **Model 1 (incidence rates):**

161 The exponential growth rate of confirmed cases was significantly different across the  
162 tested four months ( $P<0.001$ ). Moreover, the variable was significantly different in all  
163 pairwise comparisons of the tested timepoints ( $P<0.01$ ). the intercept of the model was  
164 estimated at 0.16 (CI: 0.12-0.19,  $P<0.01$ ), most of the decline in the dependent variable took  
165 place in April ( $-0.13$ , CI:  $-0.16$  - $0.10$ ,  $P<0.01$ ) and the decline continued until June ( $-0.16$ ,  
166 CI:  $-0.19$  - $0.13$ ,  $P<0.01$ ) matching with the monthly decline in median values presented in  
167 (**Figure 1**). mobility trends were a significant predictor with the highest estimate (0.00398,  
168 CI: 0.00159- 0.00638,  $P=0.002$ ) followed by temperature (0.000679, CI: 0.000169-  
169 0.001189,  $P=0.011$ ), humidity (0.000249, CI: 0.000169-0.001189,  $P=0.000$ ), and the  
170 proportion of patients above 65 years in each county ( $-0.000959$ , CI:  $-0.0016$ -  $-0.000026$ ,  
171  $P=0.012$ ). The other predictors were insignificant. The model suggests that the exponential  
172 growth rate of COVID-19 confirmed cases would be fully controlled if mobility is  
173 decreased by about 40% of the baseline over 3 months (0.1552/0.00398) controlling for the  
174 other predictors. The model also suggests that one unit decline in mobility is equal in effect

175 to about 6 degrees Celsius decline in temp (0.00398/0.000679) and about 16 degrees decline  
176 in relative humidity (0.00398/0.000249) (**Table 4**).

177 • **Model 2 (mortality rates):**

178 The exponential growth rate of deaths was significantly different across different  
179 months ( $P < 0.01$ ), and it was also significantly different in all pairwise comparisons of the  
180 tested timepoints ( $P < 0.01$ ). The intercept of the model was estimated at 0.20 (CI: 0.14-  
181 0.26,  $P < 0.01$ ), most of the decline in the dependent variable similarly took place in April  
182 (-0.14, CI: -0.19- -0.09,  $P < 0.01$ ) and the decline continued until June (-0.20, CI: -0.25 -  
183 0.14,  $P < 0.01$ ) matching with the monthly decline in median values presented in (**Figure**  
184 **1**). Mobility trends had the highest estimate (0.0027, CI: 0.00001- 0.0054,  $P = 0.049$ )  
185 followed by temperature (0.0014, CI: 0.0009- 0.0019,  $P < 0.001$ ), humidity (-0.0026, CI:  
186 0.0041- -0.0001,  $P = 0.000$ ) and PCI of countries ( $-3 \times 10^{-7}$ ,  $-5.72 \times 10^{-7}$ -  $-9.57 \times 10^{-8}$ ,  
187  $P = 0.009$ ) (**Table 5**).

188

189

190

191

192

193

194

195

196

197

198

199

200

201

## Discussion

202           Unfortunately, the pandemic of COVID-19 is spreading very rapidly across the world  
203 causing huge number of deaths despite the relatively low case fatality ratio. Based on the world  
204 meter data on October 17, number of infected population approached 40 million while the  
205 number of deaths exceeded one million and one hundred thousand worldwide.<sup>14</sup> However, this  
206 is not the worst scenario, scientist warn the word from second wave of COVID-19 especially  
207 worldwide herd immunity is still away.<sup>15</sup>

208           In this research we tried to address different ecological factors that could affect the  
209 transmissibility and fatality of COVID-19. To the best of our knowledge, this study is the first to  
210 highlight the effect of different ecological factors like temperature, and humidity concurrently  
211 with studying other humanitarian factors like social mobility across different countries  
212 simultaneously. We randomly selected 18 countries with different disease statistics located at  
213 different sites on the world map. We remarked that the increase in Exp ( $\beta$ ) of a given month  
214 implies for an increase in linear ( $\beta$ ) in the next month, so the highest calculated median Exp ( $\beta$ ) in  
215 March implied for the highest median linear ( $\beta$ ) in April 2020. This is because the exponential  
216 growth multiplies the counts over time, which in turn increases the absolute counts in the next  
217 months. We further plotted the median monthly Exp ( $\beta$ ) of confirmed cases and deaths of  
218 different continents.

### 219           **Exponential versus linear growth equation:**

220           In this research, we studied the both exponential growth and the linear pattern of COVID-  
221 19 spread within the earliest 6 months of COVID-19 pandemic. Similarly, in a study conducted  
222 by Comarova et al,<sup>16</sup> the pattern of growth was either exponential or power law growth. They  
223 further cleared that the pattern of spread of each country depended on the time when the  
224 pandemic took place; if the pandemic started early the pattern was exponential, while later  
225 pandemic following Italy was power law.

### 226           **Social mobility trends**

227           Many countries adopt different strategies of national lockdown despite its damaging effect  
228 on economy and education. Mobility can be used as a proxy measure of contact frequency, so  
229 social mobility is drastically affecting the disease transmission. It is considered as one of the

230 main control measures until an effective vaccine discovered. In the work presented the  
231 exponential growth of infection was significantly correlated with the social mobility pattern of  
232 the preceded month. This is explained by duration of incubation period of COVID-19 and  
233 reporting was recorded in the month followed. Moreover, Carteni et al,<sup>17</sup> proclaimed that both  
234 the number of tested cases, proximity to the to the outbreak area and mobility of the citizen are  
235 the main predictors of COVID-transmission. One of the significant types of social mobility was  
236 trips; within 3 weeks trips which was significantly associated with transmission risk.  
237 Interestingly, this duration exceeded the containment duration which is 14 days. In this research,  
238 the effect of social mobility may be diluted due to inclusion of countries with different wealthy  
239 index. Weil et al, reported that wealthier communities had lower social mobility than poorer  
240 communities, furthermore, the direction of mobility was more toward the least crowded areas  
241 before the pandemic than the more crowded ones and vice versa in poorer communities.<sup>18</sup> In  
242 United Kingdom, reduction of social mobility to 57.3% to 65.9% of the pre-lockdown situation  
243 would decrease the reproduction rate below 1 which means pandemic control. Reports noted that  
244 social mobility contributes to 80% of disease transmissibility.<sup>19</sup> Similarly, Badr et al,<sup>20</sup> reported  
245 the Pearson correlation between COVID-19 transmission and social mobility exceeded 0.7 in 25  
246 states in USA. In this research, the effect of social mobility may be diluted due to inclusion of  
247 countries with different wealthy index and studying other important environmental factors. Weil  
248 et al, reported that wealthier communities had lower social mobility than poorer communities,  
249 furthermore, the direction of mobility was more toward the least crowded areas before the  
250 pandemic than the more crowded ones and vice versa in poorer communities.<sup>18</sup>

251 In the current study, social mobility was revealed to be the most important determinant of  
252 the incidence and virulence of COVID-19 infections. This was simultaneously controlled by the  
253 presence of the other different determinants in the same model. The mobility patterns across the  
254 studied countries were a reflection for the nationwide decisions taken for controlling the  
255 pandemic. Most of these decisions were effective by March 2020, responding to the dramatic  
256 increase in confirmed cases and deaths. Accordingly, social mobility was decreased which in  
257 turn decreased the incidence of the disease. However, due to several causalities, most countries  
258 decided to lessen the precautionary measures and made a gradual re-opening. Most of the re-  
259 opening decisions were effective by May and June 2020. Interestingly, we remarked an  
260 inflection in the social mobility graphs in April 2020, thus we are worried about a potential

261 correlation with a second wave of the pandemic. Interestingly, the model suggests that 40%  
262 decrease in social mobility would control the incidence of the infections in 3 months, taking into  
263 considerations that the model was utilizing data from March to June 2020, during which the  
264 toughest decisions were taken by the governments.

### 265 **Temperature and Humidity:**

266 A questionable issue arose during this pandemic, whether climatic or demographic  
267 characteristics enable a more significant transmission of the virus. Environmental temperature  
268 was thought to affect the virus survival on surfaces consequently it affects viral transmissibility.  
269 The results clearly support the first reported statistically significant relationship of negative  
270 correlation between the average environmental temperature and exponential growth rates of the  
271 infected cases.<sup>21</sup> Mecenas et al,<sup>22</sup> reviewed the results of 517 published research articles that  
272 evaluated the effect of humidity and temperature on the viral spread. Only 17 articles fulfilled  
273 the inclusion criteria, they concluded that hot and wet weather significantly affect the viral  
274 transmission. On the same line, Prata et al<sup>23</sup> demonstrated that there is more than 4.8% reduction  
275 in the cumulative incidence of newly diagnosed cases with each rise in temperature by 1 °C.  
276 Interestingly, Adly,<sup>24</sup> demonstrated that the optimal temperature for virus transmission was  
277 between 13-24 ° C based on analysis of data from March to November 2020. In this research,  
278 we also remarked that temperature and humidity had a significant determinant on the incidence  
279 of COVID-19, however, the effect was trivial compared to that of social mobility

### 280 **Socioeconomic factors**

281 Since the beginning of the pandemic, there was no clue on the contribution of countries'  
282 socioeconomic attributes to the propagation of COVID-19 cases. To the best of our knowledge,  
283 no previous studies investigated these factors as determinants of transmission. In the current  
284 study, and despite showing non-significant contribution to the incidence and virulence of the  
285 infection, these attributes remain of interest for the across-country studies for controlling the  
286 other investigated attributes.

### 287 **Limitation and strength:**

288 To the best of our knowledge, this research is the first to address the pattern of the spread either  
289 linear or exponential, it modelled the effect of social mobility environmental temperature, and

290 humidity simultaneously, we did not include other important determinant of health like income,  
291 health care facilities, access to health systems, comorbidities and extra. An important point of  
292 limitation was that case definition was variable across different countries. Furthermore, case  
293 definition of suspected case or confirmed case may vary across time in the same country.  
294 Absolutely this may affect the number of reported cases and the same problem can be  
295 encountered for number of deaths. These facts may affect the external validity of our models.

296

## 297 **Conclusion**

298 Data-driven suppositions can efficiently and proactively guide the governmental measures taken  
299 to lessen the social, health, and economic impacts of COVID-19 pandemic. During the first six  
300 months of the pandemic, the multivariate analysis showed that the changes in mobility trends  
301 across countries dramatically affected the incidence and mortality rates across different  
302 countries, thus, it might be used as a proxy measure of contact frequency. Studying a set of  
303 different predictors in our models makes the estimates more accurate and precise, because the  
304 contribution of each predictor is controlled for the contribution of the other predictors in the  
305 models.

306

## 307 **Declarations**

### 308 **Ethics approval and consent to participate**

309 Not applicable

### 310 **Consent for publication**

311 Not applicable

### 312 **Availability of data and materials**

313 The datasets used and/or analyzed during the current study are available from the corresponding  
314 author on reasonable request.

### 315 **Competing interest**

316 The authors declare that they have no competing interests

317 **Funding**

318 Not applicable

319 **Conflict of interest**

320 We declare no conflicts of interest to disclose regarding this article.

321 **Acknowledgement**

322 Not applicable

## References

1. World Health Organization. World Health Report. [https://www.who.int/whr/1996/media\\_centre/press\\_release/en/](https://www.who.int/whr/1996/media_centre/press_release/en/)
2. Morens DM, Folkers GK, Fauci AS. The challenge of emerging and re-emerging infectious diseases. *Nature*. 2004;430(6996):242-249.
3. Dye C. After 2015: infectious diseases in a new era of health and development. *Philosophical Transactions of the Royal Society B: Biological Sciences*. 2014;369(1645):20130426.
4. Halliday JE, Hampson K, Hanley N, et al. Driving improvements in emerging disease surveillance through locally relevant capacity strengthening. *Science*. 2017;357(6347):146-148.
5. Binder S, Levitt AM, Sacks JJ, Hughes JM. Emerging infectious diseases: public health issues for the 21st century. *Science*. 1999;284(5418):1311-1313.
6. Woolhouse ME, Gowtage-Sequeria S. Host range and emerging and reemerging pathogens. *Emerging infectious diseases*. 2005;11(12):1842.
7. Jones KE, Patel NG, Levy MA, et al. Global trends in emerging infectious diseases. *Nature*. 2008;451(7181):990-993.
8. Xu Z, Shi L, Wang Y, et al. Pathological findings of COVID-19 associated with acute respiratory distress syndrome. *Lancet Respir Med*. 2020. DOI: [https://doi.org/10.1016/S2213-2600\(20\).2020](https://doi.org/10.1016/S2213-2600(20).2020;);
9. Worldmeter. Corona Virus. Accessed 14 August, 2020. <https://www.worldometers.info/coronavirus/>
10. Cheng VC-C, Wong S-C, Chuang VW-M, et al. The role of community-wide wearing of face mask for control of coronavirus disease 2019 (COVID-19) epidemic due to SARS-CoV-2. *J Infect*. 2020;81(1):107-114. doi:10.1016/j.jinf.2020.04.024
11. Organization WH. COVID-19 STRATEGY UPDATE. 2020. file:///C:/Users/ramy/Downloads/covid-strategy-update-14april2020.pdf
12. Dehghani R, Kassiri H. A brief review on the possible role of houseflies and cockroaches in the mechanical transmission of coronavirus disease 2019 (COVID-19). *Archives of Clinical Infectious Diseases*. 2020;15(COVID-19)



13. Barratt R, Shaban RZ, Gilbert GL. Clinician perceptions of respiratory infection risk; a rationale for research into mask use in routine practice. *Infection, disease & health*. 2019;24(3):169-176.
14. Worldmeter. COVID-19 CORONAVIRUS PANDEMIC. Accessed October 17, 2020. <https://www.worldometers.info/coronavirus/>
15. Wise J. Covid-19: Risk of second wave is very real, say researchers. *BMJ: British Medical Journal (Online)*. 2020;369
16. Komarova NL, Schang LM, Wodarz D. Patterns of the COVID-19 pandemic spread around the world: exponential versus power laws. *Journal of the Royal Society Interface*. 2020;17(170):20200518.
17. Cartenì A, Di Francesco L, Martino M. How mobility habits influenced the spread of the COVID-19 pandemic: Results from the Italian case study. *Science of The Total Environment*. 2020/11/01/ 2020;741:140489. doi:<https://doi.org/10.1016/j.scitotenv.2020.140489>
18. Weill JA, Stigler M, Deschenes O, Springborn MR. Social distancing responses to COVID-19 emergency declarations strongly differentiated by income. *Proceedings of the National Academy of Sciences*. 2020;117(33):19658. doi:10.1073/pnas.2009412117
19. Sussex Uo. Risk of return to exponential growth in Coronavirus cases if UK mobility not kept below half of pre-lockdown levels. Accessed september, 3, 2020. <http://www.sussex.ac.uk/broadcast/read/52206>
20. Badr HS, Du H, Marshall M, Dong E, Squire MM, Gardner LM. Association between mobility patterns and COVID-19 transmission in the USA: a mathematical modelling study. *The Lancet Infectious Diseases*. 2020;
21. Livadiotis G. Statistical analysis of the impact of environmental temperature on the exponential growth rate of cases infected by COVID-19. *PLoS One*. 2020;15(5):e0233875-e0233875. doi:10.1371/journal.pone.0233875
22. Mecnas P, Bastos R, Vallinoto A, Normando D. Effects of temperature and humidity on the spread of COVID-19: A systematic review. *medRxiv*. 2020;
23. Prata DN, Rodrigues W, Bermejo PH. Temperature significantly changes COVID-19 transmission in (sub)tropical cities of Brazil. *Science of The Total Environment*. 2020/08/10/ 2020;729:138862. doi:<https://doi.org/10.1016/j.scitotenv.2020.138862>

24. Anis A. The Effect of Temperature Upon Transmission of COVID-19: Australia And Egypt Case Study. *Available at SSRN 3567639*. 2020;

## Figures and Tables

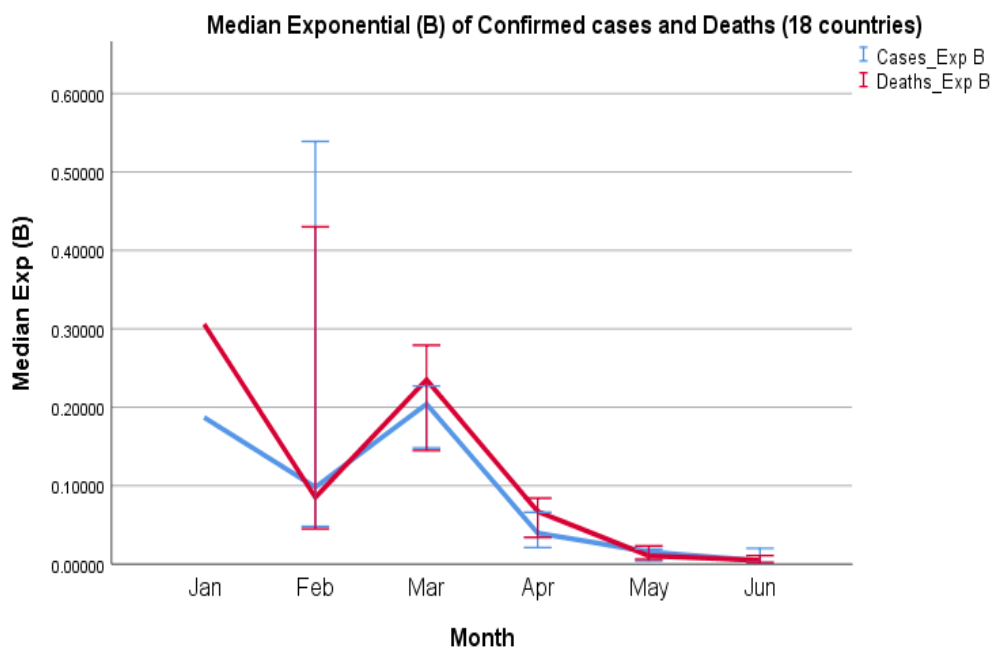

**Figure 1: Median Monthly exponential growth rate of confirmed cases and deaths**

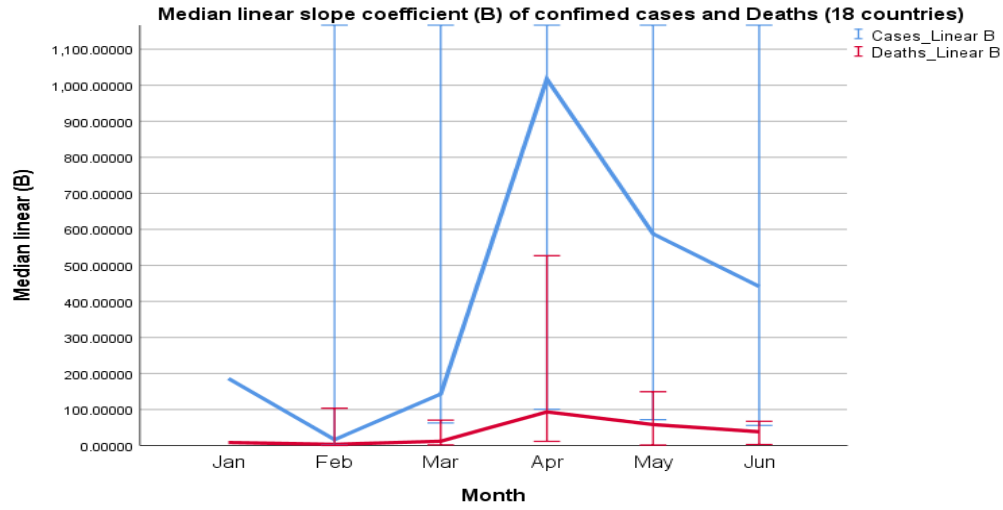

**Figure 2: Median Monthly linear growth rate for confirmed cases and deaths**

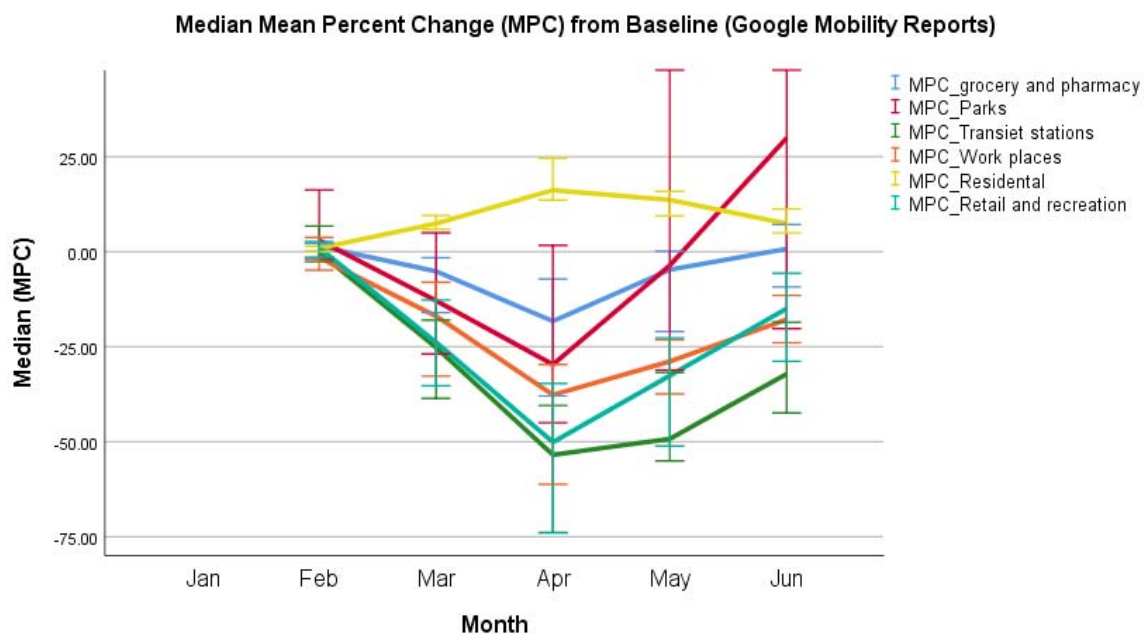

**Figure 3: Median Change in mobility trends from baseline based on Google mobility reports**

**Table 1: Correlations between changes in mobility trends toward six categories of places with exponential growth rates of cases and deaths of the same month**

|                                                              |                   |                         | Correlations     |                   |                      |         |                    |            |             |                       |
|--------------------------------------------------------------|-------------------|-------------------------|------------------|-------------------|----------------------|---------|--------------------|------------|-------------|-----------------------|
|                                                              |                   |                         | Cases_Exp growth | Deaths_Exp growth | grocery and pharmacy | Parks   | Transient stations | Workplaces | Residential | Retail and recreation |
| Spearman's rho                                               | Cases_Exp growth  | Correlation Coefficient | 1.000            | .945**            | -0.047               | -.319** | .244*              | .311**     | -0.187      | 0.078                 |
|                                                              |                   | Sig. (2-tailed)         | -                | 0.000             | 0.684                | 0.005   | 0.032              | 0.006      | 0.103       | 0.502                 |
|                                                              | Deaths_Exp growth | Correlation Coefficient | .945**           | 1.000             | -0.183               | -.345** | 0.077              | 0.070      | 0.048       | -0.121                |
|                                                              |                   | Sig. (2-tailed)         | 0.000            | -                 | 0.142                | 0.005   | 0.541              | 0.576      | 0.699       | 0.335                 |
| **. Correlation is significant at the 0.01 level (2-tailed). |                   |                         |                  |                   |                      |         |                    |            |             |                       |
| *. Correlation is significant at the 0.05 level (2-tailed).  |                   |                         |                  |                   |                      |         |                    |            |             |                       |

**Table 2: Correlations between changes in mobility trends with exponential growth rates of cases and deaths of the next month**

|                |                                                              |                         | Correlations        |                  |                      |                   |  |
|----------------|--------------------------------------------------------------|-------------------------|---------------------|------------------|----------------------|-------------------|--|
|                |                                                              |                         | Cases_Linear growth | Cases_Exp growth | Deaths_Linear growth | Deaths_Exp growth |  |
| Spearman's rho | Grocery and pharmacy                                         | Correlation Coefficient | -0.113              | .452**           | -0.193               | .495**            |  |
|                |                                                              | Sig. (2-tailed)         | 0.376               | 0.000            | 0.129                | 0.000             |  |
|                | Parks                                                        | Correlation Coefficient | -0.039              | 0.110            | -0.057               | 0.173             |  |
|                |                                                              | Sig. (2-tailed)         | 0.762               | 0.385            | 0.656                | 0.174             |  |
|                | Transient stations                                           | Correlation Coefficient | -0.080              | .712**           | -0.105               | .748**            |  |
|                |                                                              | Sig. (2-tailed)         | 0.530               | 0.000            | 0.411                | 0.000             |  |
|                | Workplaces                                                   | Correlation Coefficient | -0.184              | .770**           | -.253*               | .775**            |  |
|                |                                                              | Sig. (2-tailed)         | 0.147               | 0.000            | 0.046                | 0.000             |  |
|                | Residential                                                  | Correlation Coefficient | 0.240               | -.727**          | .284*                | -.744**           |  |
|                |                                                              | Sig. (2-tailed)         | 0.056               | 0.000            | 0.024                | 0.000             |  |
|                | Retail and recreation                                        | Correlation Coefficient | -0.212              | .688**           | -.282*               | .701**            |  |
|                |                                                              | Sig. (2-tailed)         | 0.093               | 0.000            | 0.025                | 0.000             |  |
|                | **. Correlation is significant at the 0.01 level (2-tailed). |                         |                     |                  |                      |                   |  |
|                | *. Correlation is significant at the 0.05 level (2-tailed).  |                         |                     |                  |                      |                   |  |

**Table 3: Correlations between average temperature and humidity with exponential growth rates of cases and deaths of the next month**

|                                                               |                                |                            | <b>Correlations</b>        |                     |                          |                      |
|---------------------------------------------------------------|--------------------------------|----------------------------|----------------------------|---------------------|--------------------------|----------------------|
|                                                               |                                |                            | Cases_<br>Linear<br>growth | Cases_Exp<br>growth | Deaths_ Linear<br>growth | Deaths_Exp<br>growth |
| Spearman's<br>rho                                             | Monthly<br>average<br>temp     | Correlation<br>Coefficient | -0.131                     | -0.083              | -0.172                   | -.247*               |
|                                                               |                                | Sig. (2-tailed)            | 0.271                      | 0.490               | 0.152                    | 0.038                |
|                                                               | Monthly<br>average<br>humidity | Correlation<br>Coefficient | -0.077                     | .280*               | -0.043                   | .314**               |
|                                                               |                                | Sig. (2-tailed)            | 0.519                      | 0.017               | 0.724                    | 0.008                |
| ** . Correlation is significant at the 0.01 level (2-tailed). |                                |                            |                            |                     |                          |                      |
| * . Correlation is significant at the 0.05 level (2-tailed).  |                                |                            |                            |                     |                          |                      |



**Table 4: Estimates of fixed effects (Model 1)**

| Estimates of Fixed Effects (Model 1) <sup>a, b</sup>  |              |              |        |         |       |                         |              |
|-------------------------------------------------------|--------------|--------------|--------|---------|-------|-------------------------|--------------|
| Parameter                                             | Estimate     | Std. Error   | Df     | t       | Sig.  | 95% Confidence Interval |              |
|                                                       |              |              |        |         |       | Lower Bound             | Upper Bound  |
| Intercept                                             | 0.155287     | 0.017119     | 26.127 | 9.071   | 0.000 | 0.120106                | 0.190468     |
| June                                                  | -0.163131    | 0.014233     | 16.828 | -11.461 | 0.000 | -0.193184               | -0.133078    |
| May                                                   | -0.153123    | 0.014151     | 17.062 | -10.821 | 0.000 | -0.182970               | -0.123275    |
| April                                                 | -0.129927    | 0.015765     | 16.189 | -8.242  | 0.000 | -0.163315               | -0.096539    |
| March                                                 | 0            | 0            |        |         |       |                         |              |
| PC of mobility trends                                 | 0.003987     | 0.001174     | 30.060 | 3.397   | 0.002 | 0.001590                | 0.006383     |
| Temp                                                  | 0.000679     | 0.000248     | 27.274 | 2.733   | 0.011 | 0.000169                | 0.001189     |
| Humidity                                              | 0.000249     | 5.921562E-05 | 23.021 | 4.200   | 0.000 | 0.000126                | 0.000371     |
| proportion of population above 65 years               | -0.000959    | 0.000318     | 11.136 | -3.019  | 0.012 | -0.001657               | -0.000261    |
| Diabetes prevalence                                   | 0.000429     | 0.000514     | 14.015 | 0.835   | 0.418 | -0.000673               | 0.001532     |
| PCI                                                   | 2.479417E-08 | 1.632798E-07 | 14.691 | 0.152   | 0.881 | -3.238678E-07           | 3.734561E-07 |
| a. Dependent Variable: Cases_Exp growth.              |              |              |        |         |       |                         |              |
| b. Residual is weighted by Population Density (/km2). |              |              |        |         |       |                         |              |

**Table 5: Estimates of fixed effects (Model 2)**

| Estimates of Fixed Effects (Model 2) <sup>a, b</sup>  |               |              |        |        |       |                         |               |
|-------------------------------------------------------|---------------|--------------|--------|--------|-------|-------------------------|---------------|
| Parameter                                             | Estimate      | Std. Error   | df     | t      | Sig.  | 95% Confidence Interval |               |
|                                                       |               |              |        |        |       | Lower Bound             | Upper Bound   |
| Intercept                                             | 0.199858      | 0.027476     | 18.521 | 7.274  | 0.000 | 0.142249                | 0.257467      |
| June                                                  | -0.195938     | 0.024807     | 15.868 | -7.899 | 0.000 | -0.248561               | -0.143315     |
| May                                                   | -0.183183     | 0.024708     | 15.958 | -7.414 | 0.000 | -0.235573               | -0.130793     |
| April                                                 | -0.141371     | 0.022041     | 15.503 | -6.414 | 0.000 | -0.188218               | -0.094525     |
| March                                                 | 0             | 0            |        |        |       |                         |               |
| PC of mobility trends                                 | 0.002717      | 0.001309     | 23.276 | 2.076  | 0.049 | 1.127571E-05            | 0.005423      |
| Temp                                                  | 0.001426      | 0.000251     | 18.727 | 5.676  | 0.000 | 0.000900                | 0.001952      |
| Humidity                                              | -0.000267     | 7.000827E-05 | 15.853 | -3.815 | 0.002 | -0.000416               | -0.000119     |
| proportion of population above 65 years               | -8.677099E-05 | 0.000194     | 14.971 | -0.448 | 0.660 | -0.000499               | 0.000326      |
| Diabetes prevalence                                   | 0.000404      | 0.000394     | 19.990 | 1.027  | 0.317 | -0.000417               | 0.001225      |
| PCI                                                   | -3.341040E-07 | 1.120112E-07 | 15.262 | -2.983 | 0.009 | -5.724931E-07           | -9.571477E-08 |
| a. Dependent Variable: Deaths_Exp growth.             |               |              |        |        |       |                         |               |
| b. Residual is weighted by Population Density (/km2). |               |              |        |        |       |                         |               |
